# Supplementary material for: Design and Optimization of all-thin-film CdSe/Si Tandem Solar Cells Using SCAPS-1D Simulation
Source: Research Square preprint supplement (doi:10.21203/rs.3.rs-7320575/v1), 2025-09-09
Supplement: Supplementary file 1 [file f7f362751d40a2edae8124d6.pdf]

## Supporting Information

### Design and Optimization of all-thin-film CdSe/Si Tandem Solar Cells Using SCAPS-1D Simulation

Marwa S. Salem, H. A. El-Demsisy, Ahmed Shaker, Kawther A. Al-Dhlan, Muhammad Tauseef Qureshi, Tariq S. Almurayziq, and Mohamed Okil

#### Supplementary Note S1

Main physical modeling equations utilized in SCAPS-1D in steady state.

| Semiconductor Equation | Equation Formula                                                                                                     | Description                                                                                                                                |
|------------------------|----------------------------------------------------------------------------------------------------------------------|--------------------------------------------------------------------------------------------------------------------------------------------|
| Poisson                | $\frac{d^2\psi}{dx^2} = \frac{q}{\varepsilon}(n - p + N_A^- - N_D^+ + n_t - p_t)$                                    | These are the main equations utilized in numerical solution in SCAPS-1D, where they are solved self consistently until convergence occurs. |
| Continuity             | $\begin{aligned}\frac{1}{q} \frac{dJ_n}{dx} &= U_n - G(x) \\ \frac{1}{q} \frac{dJ_p}{dx} &= G(x) - U_p\end{aligned}$ |                                                                                                                                            |
| Bulk SRH               | $R_{SRH,bulk} = \frac{(np - n_i^2)}{\tau_p(n + n_1) + \tau_n(p + p_1)}$                                              | The bulk SRH recombination is characterized by bulk minority lifetimes ( $\tau_n$ and $\tau_p$ ).                                          |
| Interface SRH          | $R_{SRH,int} = \frac{(n_{if}p_{if} - n_i^2)}{\frac{p_{if} + p_1}{S_n} + \frac{n_{if} + n_1}{S_p}}$                   | The interface SRH recombination is characterized by interface recombination velocities ( $S_n$ and $S_p$ ).                                |
| Transport              | $\begin{aligned}J_n &= qn\mu_n E + qD_n \frac{dn}{dx} \\ J_p &= qp\mu_p E - qD_p \frac{dp}{dx}\end{aligned}$         | Transport equations are utilized to calculate current densities of electrons and holes based on the drift-diffusion model.                 |

Where  $U$  is the recombination rate; includes radiative, Auger, deep traps, and impact ionization, recombination through deep traps in  $E_g$  is modeled by the Shockley Read Hall (SRH) theory, and  $G(x)$  is the rate of solar-induced carrier generation.  $x$  represents the distance below the exposed semiconductor surface,  $J_p$  and  $J_n$  are the hole and electron current densities, respectively.  $q$  is the electron charge,  $\varepsilon$  is the permittivity, and  $\psi$  is the Electrostatic potential.  $N_A^-$  and  $N_D^+$  are the acceptor and donor ionized concentrations, respectively.  $p_t$ ,  $n_t$ ,  $p$ , and  $n$  are the trapped hole, electron concentrations, hole and electron densities, respectively.

## Supplementary Note S2

The light spectrum transmitted from the top sub-cells to the bottom sub-cells is given by,

$$S(\lambda) = S_o(\lambda) \cdot \prod_{i=1}^N e^{-\alpha_i d_i} \quad (\text{S1})$$

$S(\lambda)$  is termed as the filtered spectrum. The incident spectrum for single-junction cells and top sub-cells in the multi-junction cells is air mass (AM 1.5),  $S_o(\lambda)$ .  $\alpha_i$  corresponds to the absorption coefficient for the  $i$ th layer, and  $N$  is the number of layers in the top sub-cell.

**Table S1.** Simulation parameters of the bulk defects within CdSe layer.

| Defect type                               | Single Donor           | Single Donor           |
|-------------------------------------------|------------------------|------------------------|
| Capture cross sections (cm <sup>2</sup> ) | 4.73×10 <sup>-13</sup> | 3.39×10 <sup>-13</sup> |
| Energetic distribution                    | Gaussian               | Gaussian               |
| Energy level below CBM (eV)               | 0.506                  | 0.257                  |
| Defect Density (cm <sup>-3</sup> )        | 8.18×10 <sup>14</sup>  | 2.84×10 <sup>14</sup>  |

**Table S2.** PV parameters of the CdSe cell under various optimization steps.

| Parameters                            | Defects optimization | Work function optimization | Series resistance optimization |
|---------------------------------------|----------------------|----------------------------|--------------------------------|
| $J_{\text{SC}}$ (mA/cm <sup>2</sup> ) | 19.35                | 19.36                      | 19.36                          |
| $V_{\text{OC}}$ (V)                   | 1.082                | 1.127                      | 1.127                          |
| FF (%)                                | 74.86                | 75.42                      | 80.72                          |
| PCE (%)                               | 15.68                | 16.47                      | 17.62                          |

**Table S3.** Voltage losses and open-circuit voltage parameters for the CdSe solar cell under initial and fully optimized conditions.

| CdSe Cell       | $V_{\text{OC}}^{\text{rad}}$<br>(V) | $V_{\text{OC}}$<br>(V) | $\Delta V_{\text{OC}}^{\text{rad}}$<br>(V) | $\Delta V_{\text{OC}}^{\text{rad, below-gap}}$<br>(V) | $\Delta V_{\text{OC}}^{\text{non-rad}}$<br>(V) | $\Delta V_{\text{OC}}^{\text{total}}$<br>(V) |
|-----------------|-------------------------------------|------------------------|--------------------------------------------|-------------------------------------------------------|------------------------------------------------|----------------------------------------------|
| Intial          | 1.285                               | 0.584                  | 0.260                                      | 0.185                                                 | 0.701                                          | 1.146                                        |
| Fully-optimized | 1.288                               | 1.127                  | 0.260                                      | 0.183                                                 | 0.161                                          | 0.603                                        |
